# Supplementary material for: An investigation of the metabolic activity, isozyme contribution, species differences and potential drug–drug interactions of PI-103, and the identification of efflux transporters for PI-103-O-glucuronide in HeLa1A9 cells
Source: Royal Society of Chemistry journal article supplement (doi:10.1039/c9ra09906a), 2020-01-01
Supplement: c9ra09906a1.pdf [file c9ra09906a1.pdf]

### Supporting information

An investigation of the metabolic activity, isozyme contribution, species differences and potential drug-drug interactions of PI-103, and the identification of efflux transporters for PI-103-*O*-glucuronide in HeLa1A9 cells

Li Gao,<sup>ab</sup> Zifei Qin,<sup>\*ab</sup> Beibei Zhang,<sup>ab</sup> Zhao Yin,<sup>ab</sup> Xiaojian Zhang,<sup>ab</sup> and Jing Yang,<sup>\*ab</sup>

<sup>a</sup> *Department of Pharmacy, the First Affiliated Hospital of Zhengzhou University, Zhengzhou 450052, China;*

<sup>b</sup> *Henan Key Laboratory of Precision Clinical Pharmacy, Zhengzhou University, Zhengzhou 450052, China;*

#### **\* Corresponding authors**

E-mail: qzf1989@163.com (Zifei Qin); jingyang\_0101@163.com (Jing Yang); Tel.: +86-371-66913423;

## Figure legends

**Figure S1 Kinetic profiles for metabolic activities of PI-103 in HLM and HIM.** (A) Mono-oxidation of PI-103 in HLM; (B) Mono-oxidation of PI-103 in HIM; (C) Mono-glucuronidation of PI-103 in HLM; (D) Mono-glucuronidation of PI-103 in HIM; In each panel, the insert figure showed the corresponding Eadie-Hofstee plot. All experiments were performed in triplicate.

**Figure S2 Metabolic rates of PI-103 by expressed CYP and UGT enzymes at 1 and 10  $\mu\text{M}$ .** (A) Metabolic rates for mono-oxidation of PI-103 by twelve expressed CYP isoforms; (B) Metabolic rates for mono-glucuronidation of PI-103 by thirteen expressed UGT isoforms; All experiments were performed in triplicate. N.D.: not detected; N.A.: due to the concentration under the limit of quantification, it was unavailable to determine the kinetic parameters.

**Figure S3 Kinetic profiles for mono-oxidation of PI-103 in five expressed CYP enzymes.** (A) Kinetic profiles by CYP1A1; (B) Kinetic profiles by CYP1A2; (C) Kinetic profiles by CYP1B1; (D) Kinetic profiles by CYP3A4; (E) Kinetic profiles by CYP3A5; In each panel, the insert figure showed the corresponding Eadie-Hofstee plot. All experiments were performed in triplicate.

**Figure S4 Kinetic profiles for mono-glucuronidation of PI-103 in six expressed UGT enzymes.** (A) Kinetic profiles by UGT1A1; (B) Kinetic profiles by UGT1A3; (C) Kinetic profiles by UGT1A7; (D) Kinetic profiles by UGT1A8; (E) Kinetic profiles by UGT1A9; (E) Kinetic profiles by UGT1A10; In each panel, the insert figure showed the corresponding Eadie-Hofstee plot. All experiments were performed in triplicate.

**Figure S5 Inhibitory effects of several inhibitors on the metabolic activities of PI-103 in HLM.** (A) Inhibitory effects on mono-oxidation of PI-103; (B) Inhibitory effects on mono-glucuronidation of PI-103; All experiments were performed in triplicate. (\*, # Compared with the control values of M1 and M2 in HLM, respectively. \*, #  $p < 0.05$ , \*\*, ##  $p < 0.01$ , \*\*\*, ###  $p < 0.001$ )

**Figure S6 Correlation analysis for the metabolic activities of PI-103 in a bank of individual HLM (n = 12).** (A) Correlation analysis between PI-103-oxidation and phenacetin-N-deacetylation; (B) Correlation analysis between PI-103-oxidation and

nifedipine-oxidation; (C) Correlation analysis between PI-103-*O*-glucuronidation and  $\beta$ -estradiol-3-*O*-glucuronidation; (D) Correlation analysis between PI-103-*O*-glucuronidation and propofol-*O*-glucuronidation; All experiments were performed in triplicate. (\*  $p < 0.05$ , \*\* $p < 0.01$ , \*\*\* $p < 0.001$ ).

**Figure S7 Kinetic profiles for mono-oxidation of PI-103 by various types of microsomes.** (A) Kinetic profiles by dog liver microsomes (DLM); (B) Kinetic profiles by mice liver microsomes (MLM); (C) Kinetic profiles by rat liver microsomes (RLM); (D) Kinetic profiles by mini-pig liver microsomes (MpLM); In each panel, the insert figure showed the corresponding Eadie-Hofstee plot. All experiments were performed in triplicate.

**Figure S8 Kinetic profiles for mono-glucuronidation of PI-103 by various types of microsomes.** (A) Kinetic profiles by dog liver microsomes (DLM); (B) Kinetic profiles by mice liver microsomes (MLM); (C) Kinetic profiles by rat liver microsomes (RLM); (D) Kinetic profiles by mini-pig liver microsomes (MpLM); In each panel, the insert figure showed the corresponding Eadie-Hofstee plot. All experiments were performed in triplicate.

**Figure S9 UGT1A9-mediated PI-103-*O*-glucuronidation in HeLa1A9 cells.** (A) Excreted PI-103-*O*-glucuronide in extracellular solution at two concentrations of propofol (2.5 and 5  $\mu\text{M}$ ); (B) Excreted rates of PI-103-*O*-glucuronide at different concentrations (2.5 and 5  $\mu\text{M}$ ); All experiments were performed in triplicate. Data were presented as mean  $\pm$  SD. \*  $p < 0.05$ , \*\*  $p < 0.01$  or \*\*\*  $p < 0.001$  compared with that of PI-103 (2.5  $\mu\text{M}$ ).

**Figure S10 Concentration-dependent inhibition evaluation of PI-103 towards several expressed CYP enzymes.** (A) Concentration-dependent plot towards CYP1A1-mediated ethoxyresorufin-deethylation; (B) Concentration-dependent plot towards CYP1A2-mediated phenacetin-*N*-deacetylation; (C) Concentration-dependent plot towards CYP2B6-mediated bupropion-hydroxylation; (D) Concentration-dependent plot towards CYP2C9-mediated tolbutamide-4-hydroxylation; (E) Concentration-dependent plot towards CYP2C19-mediated mephenytoin-4-hydroxylation; (F) Concentration-dependent plot towards CYP2E1-mediated chlorzoxazone-6-

hydroxylation; All experiments were performed in triplicate. Data were presented as mean  $\pm$  SD.

**Figure S11** Concentration-dependent inhibition evaluation of PI-103 against several expressed UGT enzymes. (A) Concentration-dependent plot against UGT1A3-mediated 4-MU-glucuronidation; (B) Concentration-dependent plot against UGT1A6-mediated 4-MU-glucuronidation; (C) Concentration-dependent plot against UGT1A7-mediated 4-MU-glucuronidation; (D) Concentration-dependent plot against UGT1A9-mediated propofol-glucuronidation; (E) Concentration-dependent plot against UGT2B7-mediated 4-MU glucuronidation; All experiments were performed in triplicate. Data were presented as mean  $\pm$  SD.

#### **Table list**

**Table S1** Detailed UHPLC and MRM conditions information for quantification of the metabolites of specific substrates

**Table S2** Selection of inhibition type of PI-103 towards six CYPs and five UGTs isozyms

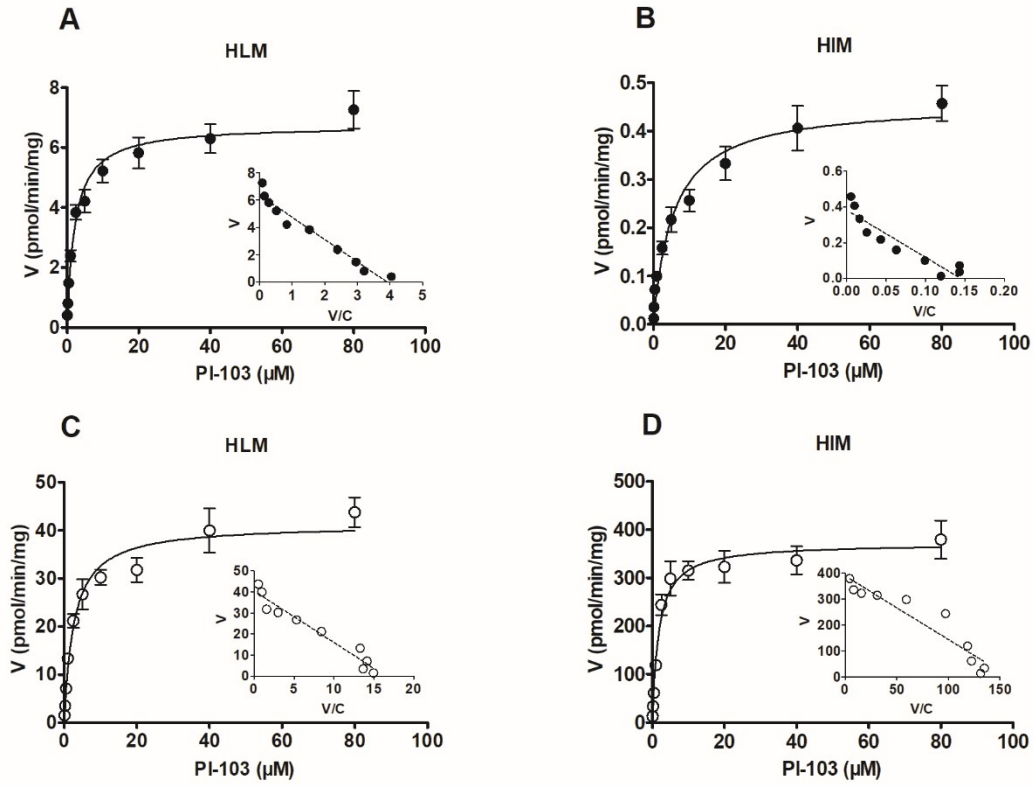

Figure S1

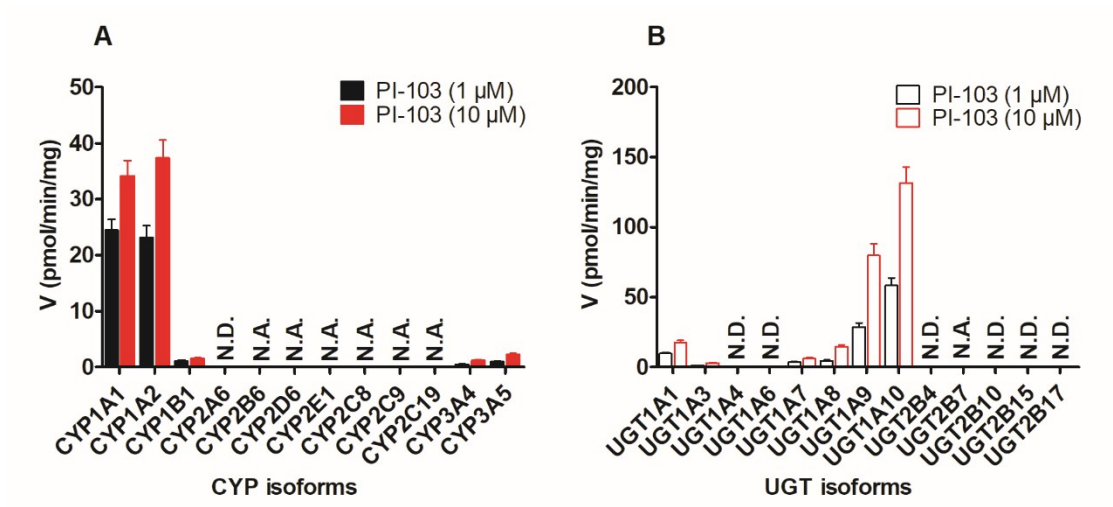

Figure S2

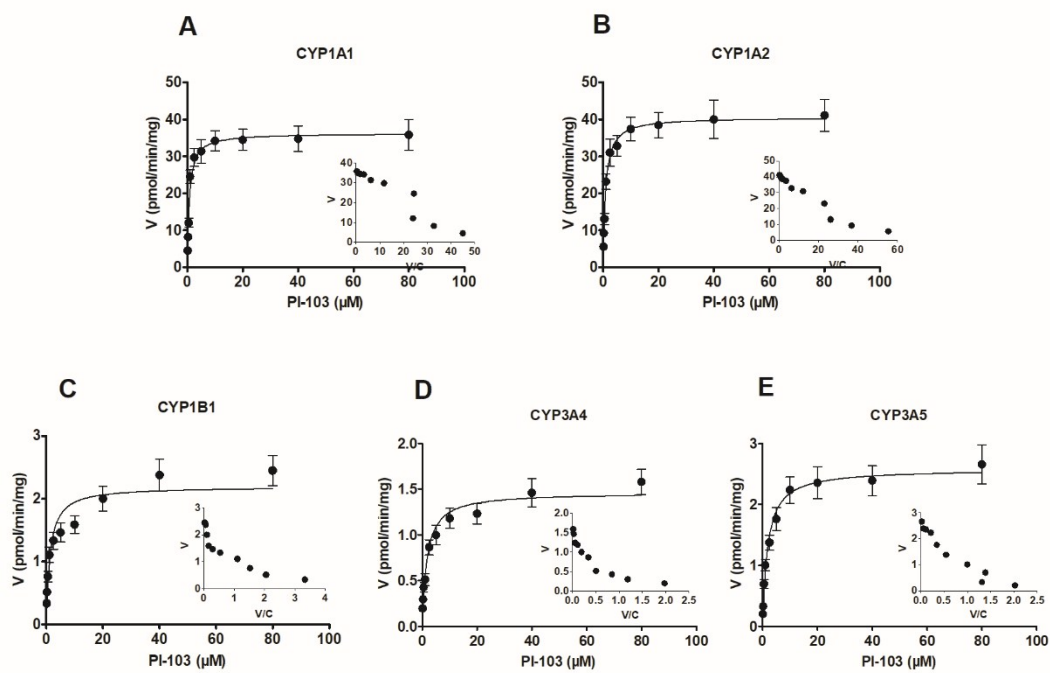

Figure S3

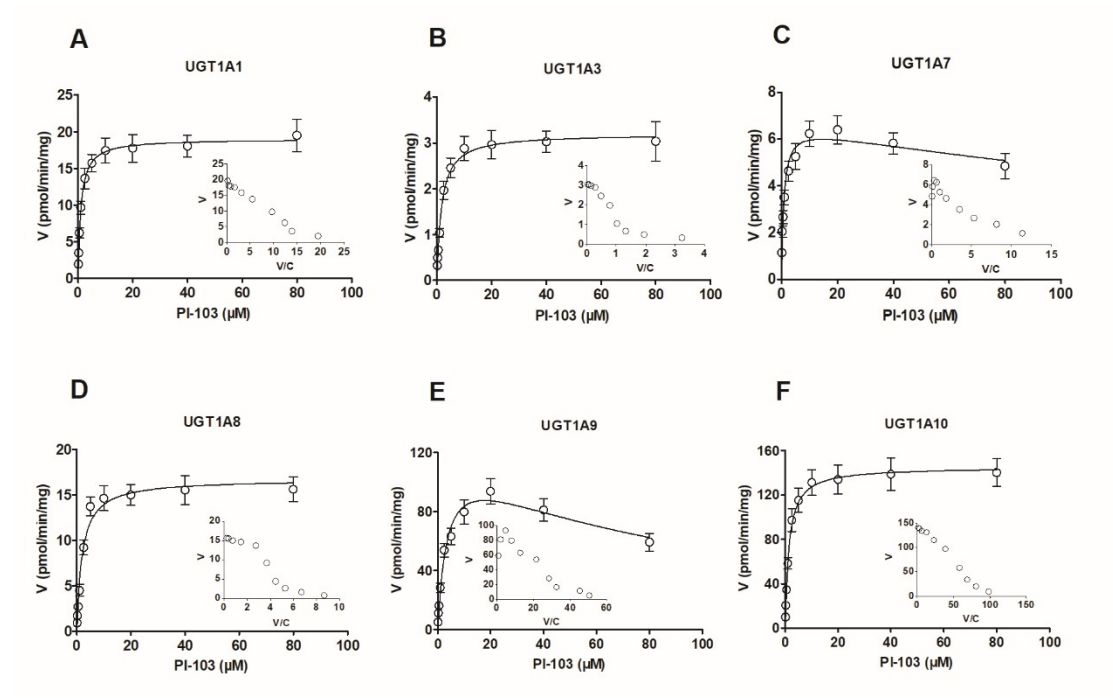

**Figure S4**



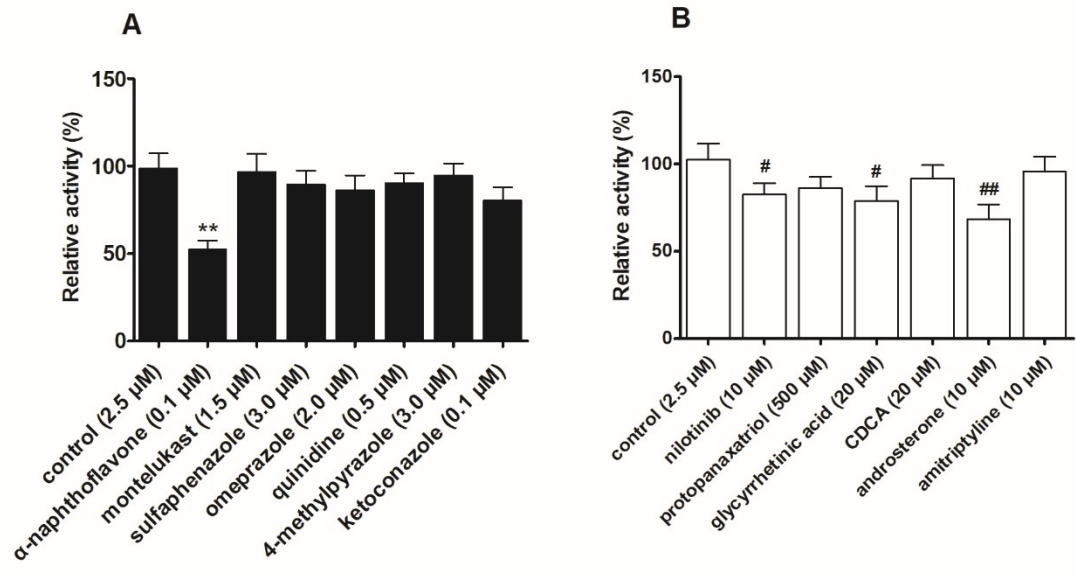

Figure S5

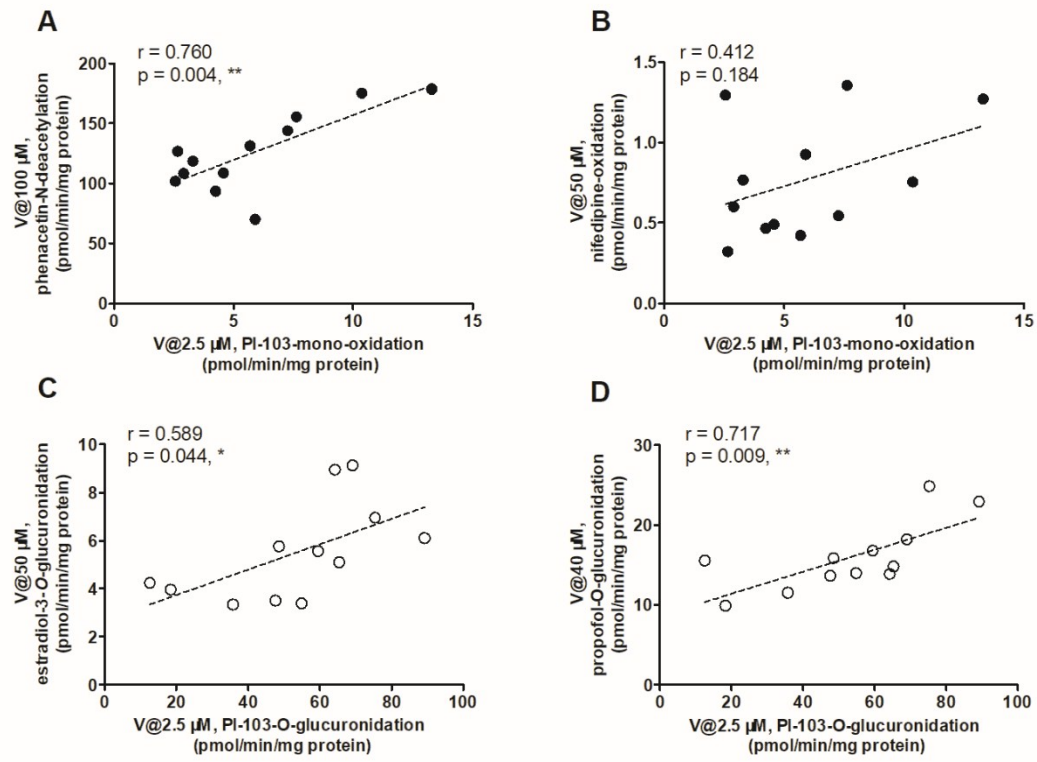

Figure S6

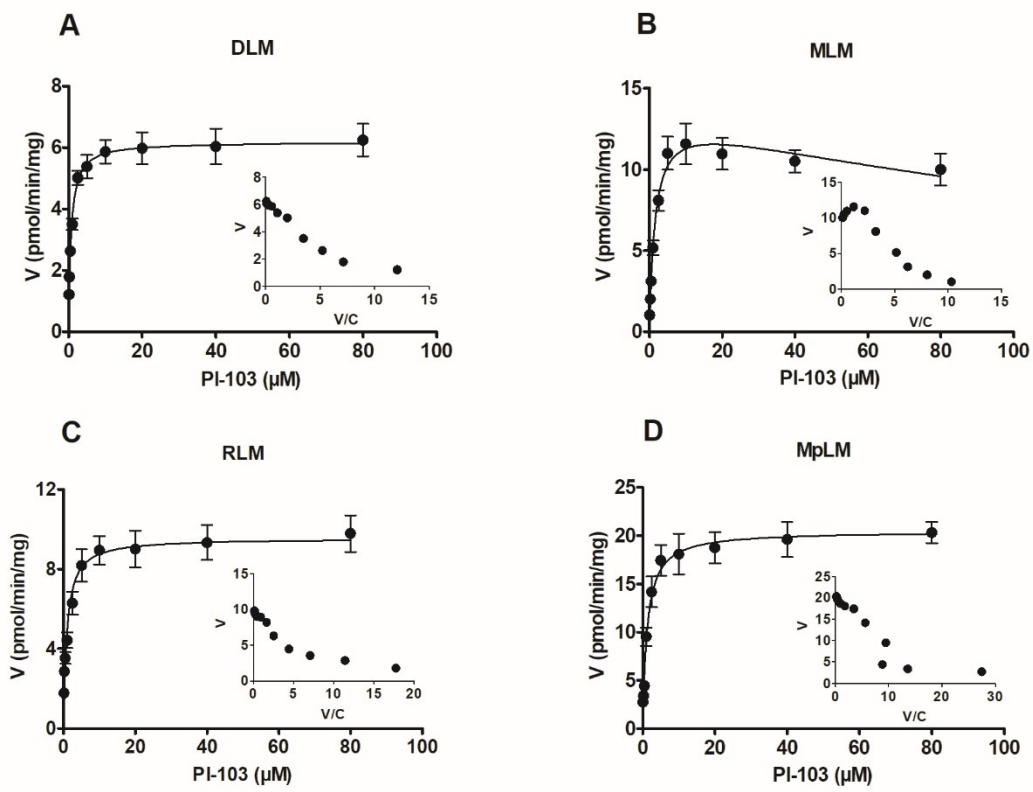

Figure S7

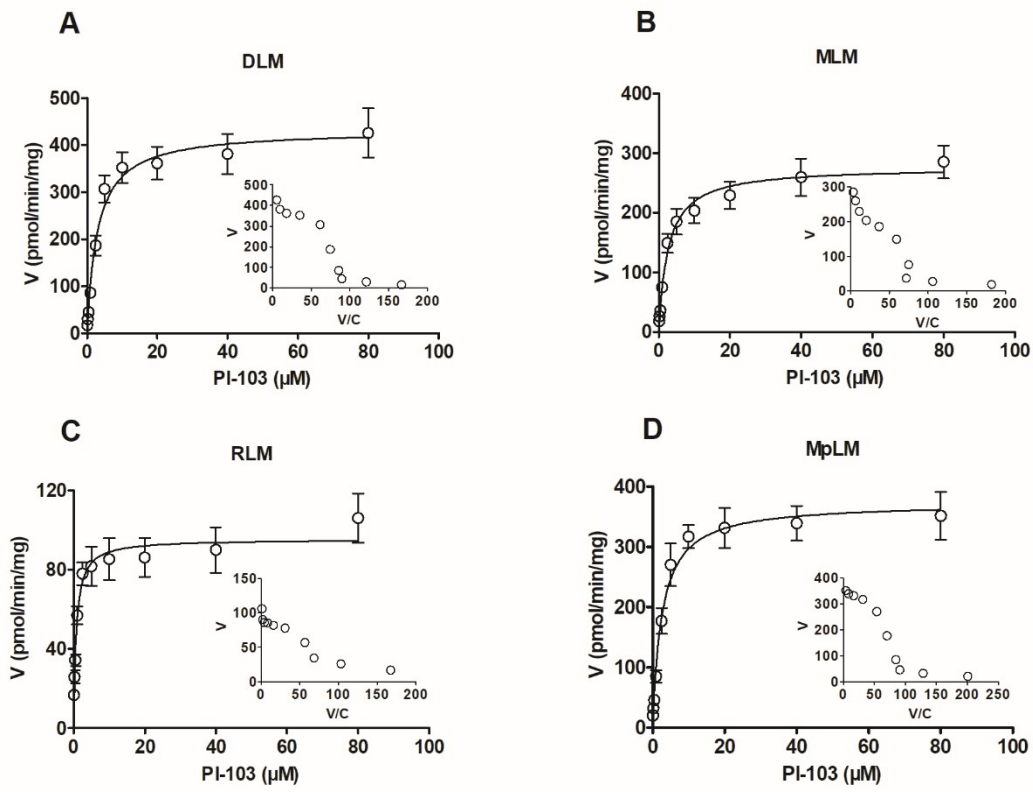

Figure S8

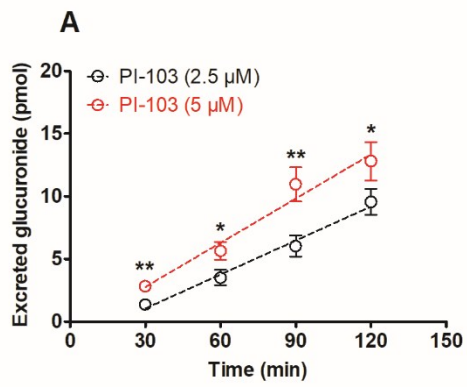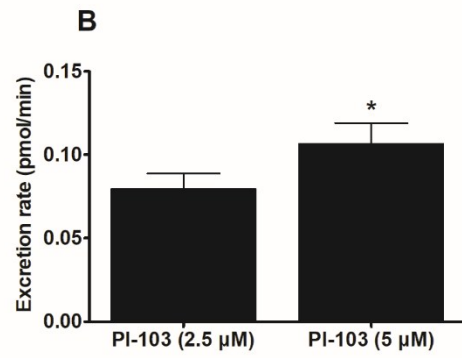

Figure S9

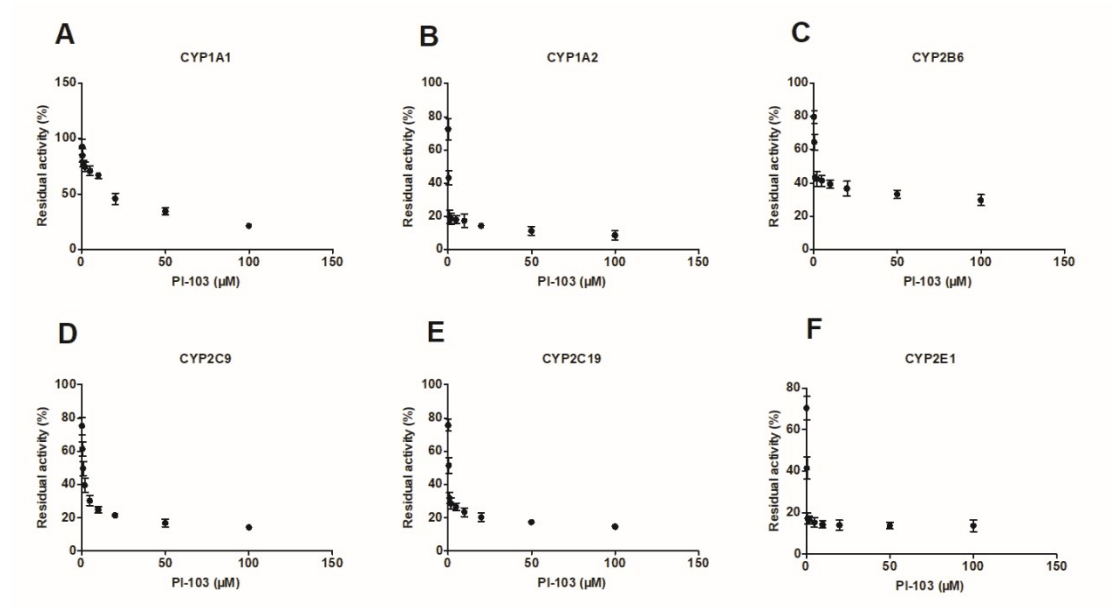

**Figure S10**

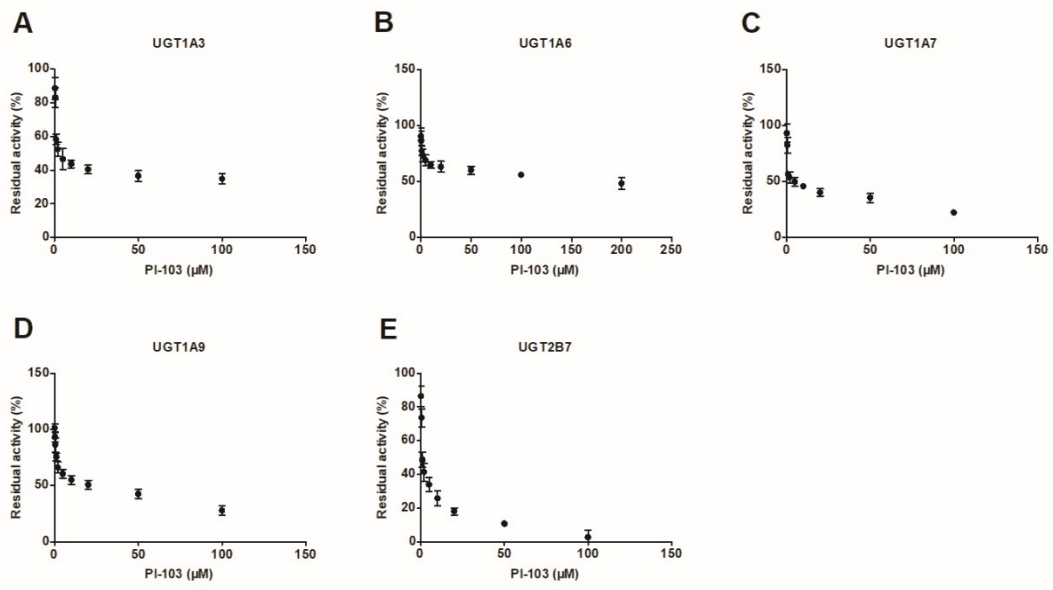

**Figure S11**

**Table S1** Detailed UHP LC and MRM conditions information for quantification of the metabolites of specific substrates

| Enzymes           | Substrates         | Metabolites                      | UHPLC conditions   | t <sub>R</sub> (min) | MRM Conditions |                 |          |               |
|-------------------|--------------------|----------------------------------|--------------------|----------------------|----------------|-----------------|----------|---------------|
|                   |                    |                                  |                    |                      | Parent (m/z)   | Daughters (m/z) | Cone (V) | Collision (V) |
| Human CYP enzymes |                    |                                  |                    |                      |                |                 |          |               |
| CYP1A1            | ethoxyresorufin    | resorufin                        | 0-0.4 min, 10%B;   | 1.45 (+)             | 214.050        | 186.020         | 60       | 25            |
| CYP1A2            | phenacetin         | paracetamol                      | 0.4-1.4 min, 10%-  | 0.91 (+)             | 152.071        | 110.050         | 50       | 15            |
| CYP2A6            | coumarin           | 7-hydroxycoumarin                | 95%B; 1.4-1.6 min, | 1.42 (+)             | 163.040        | 107.030         | 40       | 20            |
| CYP2B6            | bupropion          | hydroxybupropion                 | 95%B; 1.6-1.8 min, | 1.37 (+)             | 256.110        | 238.100         | 20       | 10            |
| CYP2C8            | paclitaxel         | 6 $\alpha$ -hydroxy-paclitaxel   | 95%-10%B; 1.8-2.0  | 1.75 (+)             | 870.334        | 105.200         | 30       | 45            |
| CYP2C9            | tolbutamide        | 4-hydroxytolbutamide             | min, 10%B;         | 1.50 (+)             | 287.107        | 89.300          | 30       | 40            |
| CYP2C19           | S-mephenytoin      | 4-hydroxymephenytoin             |                    | 1.41 (+)             | 235.108        | 150.100         | 40       | 20            |
| CYP2E1            | chlorzoxazone      | 6-hydroxychlorzoxazone           | 0.3 ml/min         | 1.36 (-)             | 183.980        | 119.900         | 40       | 20            |
| CYP3A4            | nifedipine         | oxidized nifedipine              | 35 °C              | 1.76 (+)             | 345.109        | 284.100         | 60       | 30            |
| CYP3A5            | nifedipine         | oxidized nifedipine              |                    | 1.76 (+)             | 345.109        | 284.100         | 60       | 30            |
| Human UGT enzymes |                    |                                  |                    |                      |                |                 |          |               |
| UGT1A1            | $\beta$ -estradiol | $\beta$ -estradiol-3-glucuronide | 0-0.4 min, 10%B;   | 1.48 (-)             | 447.202        | 113.200         | 50       | 20            |
| UGT1A3            | 4-MU               | 4-MU-glucuronide                 | 0.4-1.4 min, 10%-  | 1.30 (-)             | 351.072        | 175.050         | 30       | 25            |
| UGT1A4            | TFP                | TFP- <i>N</i> -glucuronide       | 95%B; 1.4-1.6 min, | 1.58 (+)             | 584.204        | 408.210         | 50       | 25            |
| UGT1A6            | 4-MU               | 4-MU-glucuronide                 | 95%B; 1.6-1.8 min, | 1.30 (-)             | 351.072        | 175.050         | 30       | 25            |
| UGT1A7            | 4-MU               | 4-MU-glucuronide                 | 95%-10%B; 1.8-2.0  | 1.30 (-)             | 351.072        | 175.050         | 30       | 25            |
| UGT1A8            | 4-MU               | 4-MU-glucuronide                 | min, 10%B;         | 1.30 (-)             | 351.072        | 175.050         | 30       | 25            |
| UGT1A9            | propofol           | propofol- <i>O</i> -glucuronide  |                    | 1.60 (-)             | 353.160        | 177.100         | 50       | 25            |
| UGT1A10           | 4-MU               | 4-MU-glucuronide                 | 0.3 ml/min         | 1.30 (-)             | 351.072        | 175.050         | 30       | 25            |
| UGT2B4            | 4-MU               | 4-MU-glucuronide                 | 35 °C              | 1.30 (-)             | 351.072        | 175.050         | 30       | 25            |
| UGT2B7            | 4-MU               | 4-MU-glucuronide                 |                    | 1.30 (-)             | 351.072        | 175.050         | 30       | 25            |
| UGT2B10           | 4-MU               | 4-MU-glucuronide                 |                    | 1.30 (-)             | 351.072        | 175.050         | 30       | 25            |
| UGT2B15           | 4-MU               | 4-MU-glucuronide                 |                    | 1.30 (-)             | 351.072        | 175.050         | 30       | 25            |



---

|         |      |                  |          |         |         |    |    |
|---------|------|------------------|----------|---------|---------|----|----|
| UGT2B17 | 4-MU | 4-MU-glucuronide | 1.30 (-) | 351.072 | 175.050 | 30 | 25 |
|---------|------|------------------|----------|---------|---------|----|----|

---

Note: 4-MU, 4-methylumbelliferone; TFP, trifluoperazine; (+) and (-) means ESI+ and ESI-, respectively.

**Table S2** Selection of inhibition type of PI-103 towards six CYPs and five UGTs isozymes

| Isozymes | Substrate     | Type of inhibition | $K_i$ ( $\mu\text{M}$ ) | $\alpha$  | Goodness of fit ( $R^2$ ) | AIC     | SC      | Selection |
|----------|---------------|--------------------|-------------------------|-----------|---------------------------|---------|---------|-----------|
| UGT1A3   | 4-MU          | Competitive        | 0.94±0.27               | —         | 0.9368                    | -164.81 | -162.49 |           |
|          |               | Noncompetitive     | 5.22±0.48               | —         | 0.9689                    | -176.16 | -173.84 |           |
|          |               | Mixed-type         | 2.58±0.84               | 2.97±1.61 | 0.9757                    | -178.09 | -175.00 | ✓         |
| UGT1A7   | 4-MU          | Competitive        | 1.15±0.34               | —         | 0.9242                    | -143.50 | -141.18 |           |
|          |               | Noncompetitive     | 5.64±0.60               | —         | 0.9611                    | -154.18 | -151.86 | ✓         |
|          |               | Mixed-type         | 3.32±1.37               | 2.28±1.52 | 0.9648                    | -153.76 | -150.67 |           |
| UGT2B7   | 4-MU          | Competitive        | 0.75±0.13               | —         | 0.9691                    | -226.97 | -224.66 |           |
|          |               | Noncompetitive     | 1.35±0.15               | —         | 0.9721                    | -228.62 | -226.30 | ✓         |
|          |               | Mixed-type         | 1.13±0.43               | 1.66±1.92 | 0.9726                    | -226.86 | -223.77 |           |
| CYP1A2   | Phenacetin    | Competitive        | 0.08±0.02               | —         | 0.9288                    | -102.20 | -99.88  |           |
|          |               | Noncompetitive     | 0.38±0.03               | —         | 0.9779                    | -120.90 | -118.58 | ✓         |
|          |               | Mixed-type         | 0.26±0.10               | 1.70±0.93 | 0.9793                    | -120.01 | -116.61 |           |
| CYP2B6   | Bupropion     | Competitive        | 0.40±0.08               | —         | 0.9594                    | -217.86 | -215.55 |           |
|          |               | Noncompetitive     | 1.44±0.17               | —         | 0.9567                    | -216.81 | -214.49 |           |
|          |               | Mixed-type         | 0.64±0.22               | 5.09±4.48 | 0.9673                    | -219.32 | -216.23 | ✓         |
| CYP2C9   | Tolbutamide   | Competitive        | 0.24±0.05               | —         | 0.9640                    | -224.83 | -222.51 |           |
|          |               | Noncompetitive     | 0.96±0.06               | —         | 0.9859                    | -239.83 | -237.51 |           |
|          |               | Mixed-type         | 0.56±0.12               | 2.45±0.94 | 0.9901                    | -243.41 | -240.32 | ✓         |
| CYP2C19  | Mephenytoin   | Competitive        | 0.11±0.04               | —         | 0.8967                    | -143.75 | -141.44 |           |
|          |               | Noncompetitive     | 0.53±0.03               | —         | 0.9848                    | -174.46 | -172.14 | ✓         |
|          |               | Mixed-type         | 0.68±0.27               | 0.71±0.37 | 0.9854                    | -173.05 | -169.96 |           |
| CYP2E1   | Chlorzoxazone | Competitive        | 0.06±0.01               | —         | 0.9549                    | -142.25 | -139.94 |           |
|          |               | Noncompetitive     | 0.25±0.01               | —         | 0.9949                    | -177.37 | -175.05 | ✓         |
|          |               | Mixed-type         | 0.21±0.04               | 1.33±0.37 | 0.9953                    | -176.64 | -173.55 |           |

Note: 4-MU, 4-methylumbelliferone.
